# Supplementary material for: Data driven discovery of cyber physical systems
Source: Springer Nature journal article supplement (doi:10.1038/s41467-019-12490-1), 2019-10-25
Supplement: 41467_2019_12490_MOESM2_ESM.pdf [file 41467_2019_12490_MOESM2_ESM.pdf]

## **Description of Additional Supplementary Files**

File Name: Supplementary Movie 1

Description: IHYDE successfully reverse engineered the model of designed autonomous car from data and discovered the software bug
